# Supplementary material for: Termites and subsocial roaches inherited many bacterial-borne carbohydrate-active enzymes (CAZymes) from their common ancestor
Source: PubMed Central journal article supplement — Commun Biol. 2024 Nov 6;7:1449. doi: 10.1038/s42003-024-07146-w (PMC11541852; doi:10.1038/s42003-024-07146-w), 2024-11-06
Supplement: 42003_2024_7146_MOESM1_ESM.pdf [file 42003_2024_7146_MOESM1_ESM.pdf]

## Description of Additional Supplementary Files

**File name:** Supplementary Data 1

**Description:** List of samples used in this study.

**File name:** Supplementary Data 2

**Description:** . CAZymes found in every sample used in this study.

**File name:** Supplementary Data 3

**Description:** Phylogenetic trees of 116 CAZymes containing termite-specific clusters (TSCs).

**File name:** Supplementary Data 4

**Description:** List of the 126 CAZyme families and subfamilies containing 420 termite-specific clusters (TSCs) found in this study.

**File name:** Supplementary Data 5

**Description:** Phylogenetic trees of 420 termite-specific clusters (TSCs).

**File name:** Supplementary Data 6

**Description:** Results of the cophylogenetic analyses for every termite-specific cluster (TSC).
